# Supplementary material for: Osteosarcoma without prior retinoblastoma related to RB1 low‐penetrance germline pathogenic variants: A novel type of RB1‐related hereditary predisposition syndrome?
Source: PubMed Central journal article supplement — Mol Genet Genomic Med. 2019 Sep 30;7(12):e913. doi: 10.1002/mgg3.913 (PMC6900371; doi:10.1002/mgg3.913), 2019-09-30
Supplement: MGG3-7-e913-s001.pdf [file MGG3-7-e913-s001.pdf]

I.

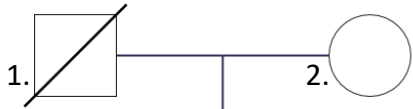

1. 1922 – 1989  
d. 67 y

2.

II.

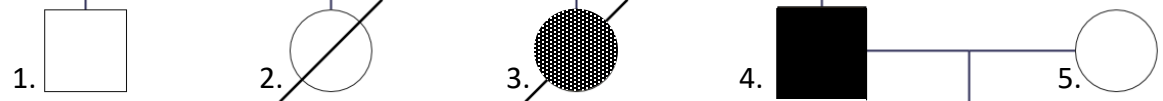

1. b. 1954  
Arthrogryposis

2. d. 1 (?)  
Arthrogryposis

3. d. 3 (Metastatic bilateral retinoblastoma)  
Retinoblastoma dx <1

4. **PATIENT A**  
b. 1950  
RB1: m  
Osteosarcoma dx 65

5.

III.

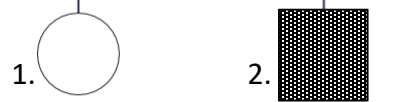

1. b. 1977  
RB1: ?

2. **PROBAND**  
b. 1980  
RB1: m  
Retinoblastoma bilat. dx 2

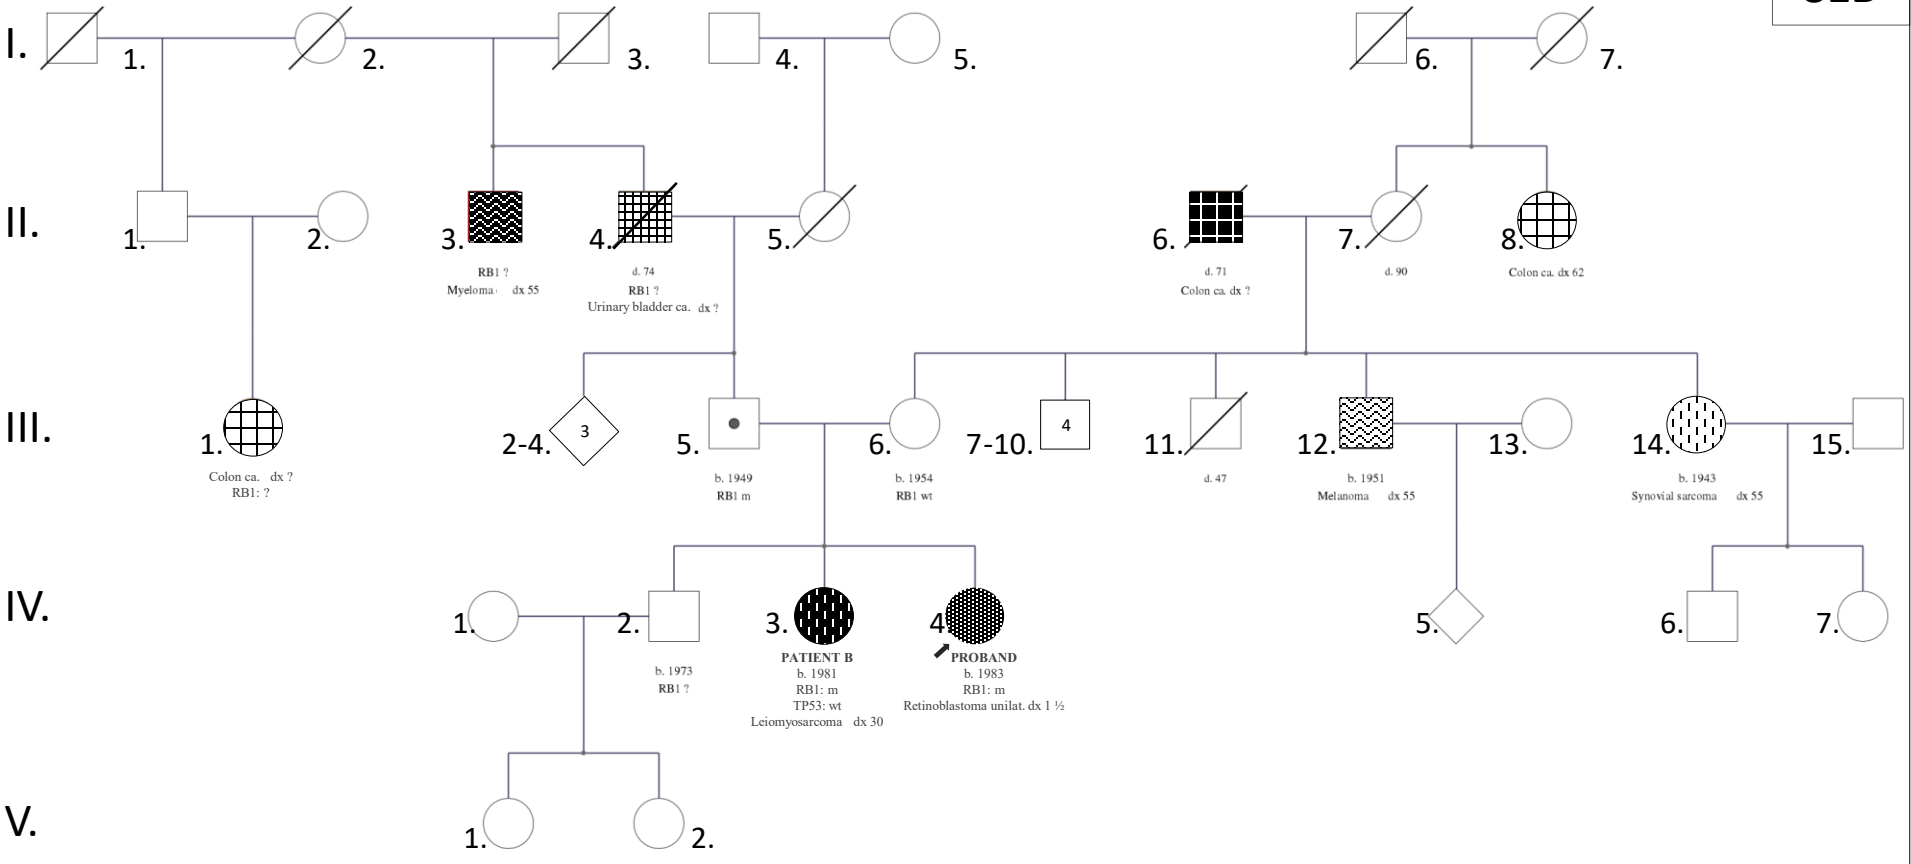

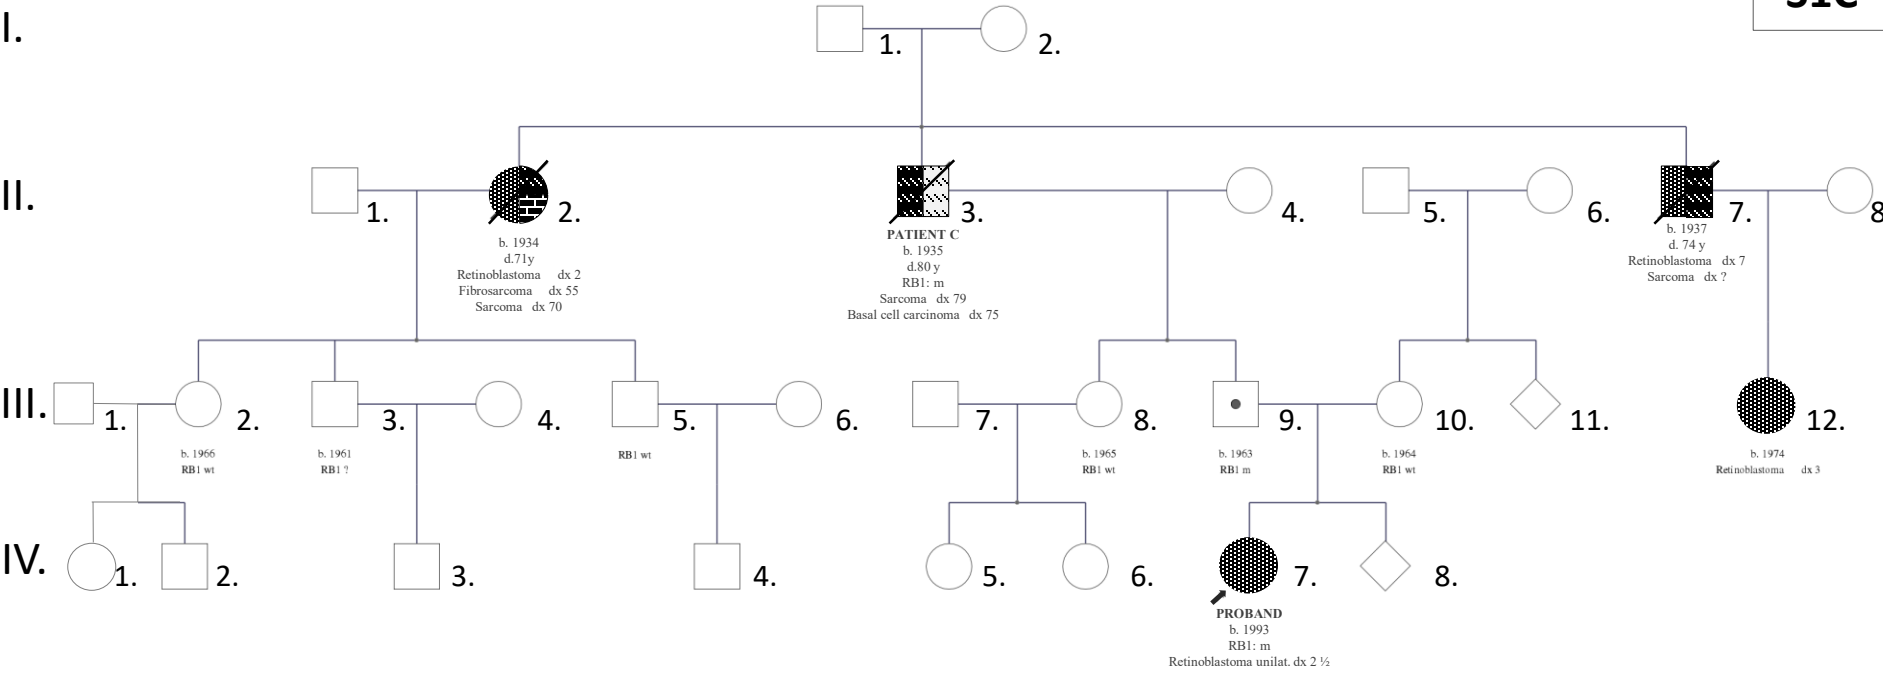

I.

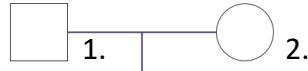

II.

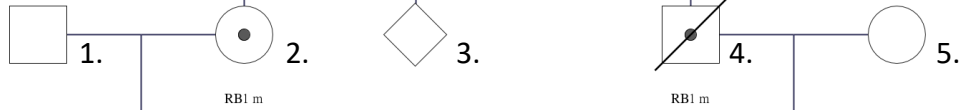

III.

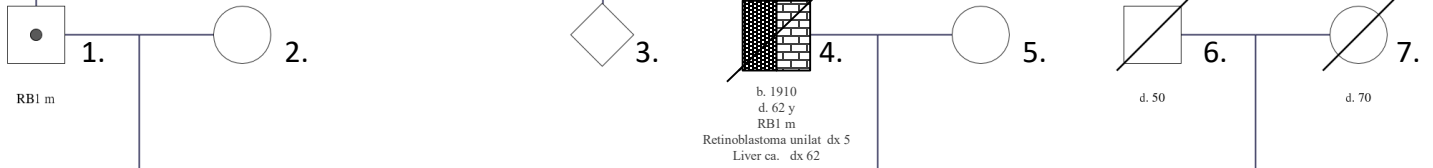

IV.

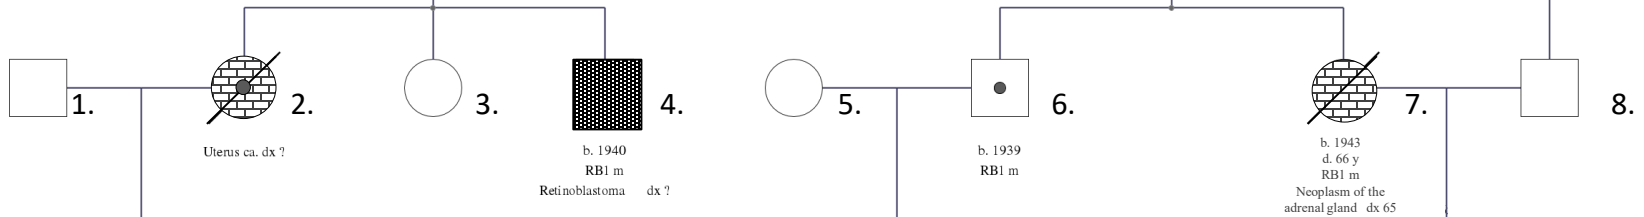

V.

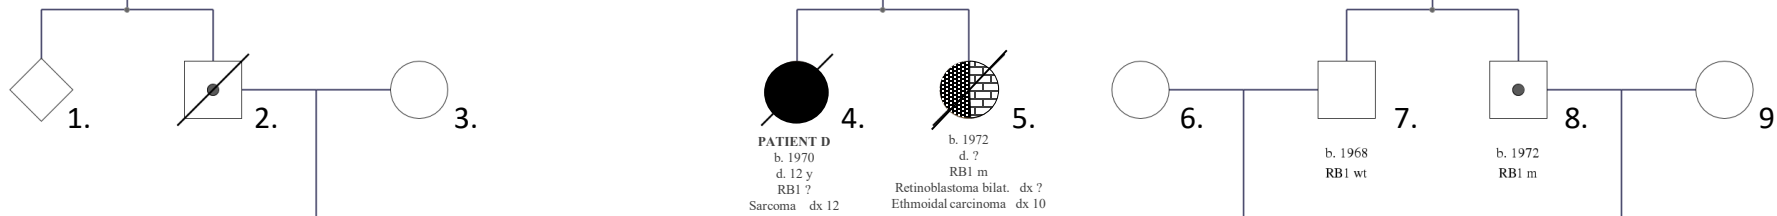

VI.

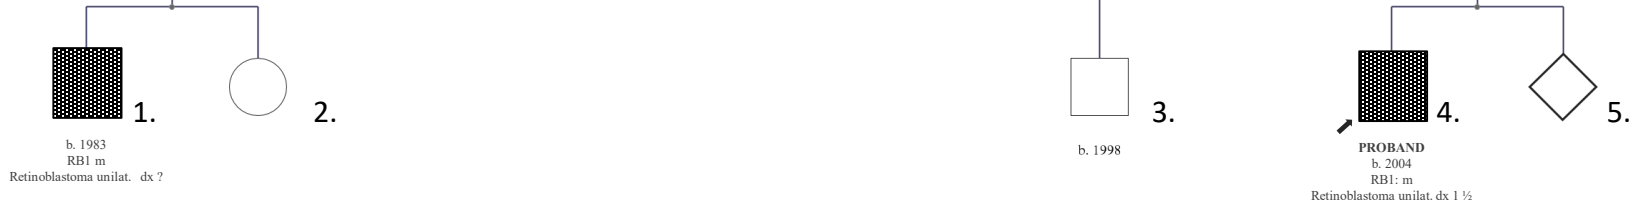

**Figure S1: Pedigrees of 4 unpublished additional families with *RB1* low-penetrance mutation carriers diagnosed with osteosarcoma or sarcoma without prior retinoblastoma**

(genetic testing performed in Institut Curie, Paris, France) (NM\_000321.2)

S1A. Family A : c.55del ; p.(Glu19Asnfs\*48)

S1C Family C: c.264+5G>A

S1B Family B: c.1981C>T ; p.(Arg661Trp)

S1D Family D: c.1981C>T ; p.(Arg661Trp)

RB1 m: carrier of the pathogenic variant in *RB1*

RB1 wt: *RB1* wild type

RB1 ? : *RB1* sequencing not performed

TP53 wt: *TP53* wild type

dx xx: cancer diagnosis at age xx years old

b.: year of birth

d.: age at death

unilat.: unilateral

bilat.: bilateral

?: unavailable data

ca.: cancer

|                                                                                      |                                                    |                                                                                      |                      |
|--------------------------------------------------------------------------------------|----------------------------------------------------|--------------------------------------------------------------------------------------|----------------------|
|    | Osteosarcoma                                       |   | Melanoma             |
|    | Retinoblastoma                                     |   | Urinary tract cancer |
|    | Leiomyosarcoma                                     |   | Colon cancer         |
|    | Synovial sarcoma                                   |   | Myeloma              |
|    | Sarcoma                                            |   | Basal cell carcinoma |
|   | Fibrosarcoma                                       |  | Cancer: other types  |
|  | carrier (obligate or confirmed by genetic testing) |                                                                                      |                      |
